# Supplementary material for: Unveiling the role of a ground state charge transfer complex in carbon nanoparticles for highly efficient metal-free solar hydrogen production
Source: Royal Society of Chemistry journal article supplement (doi:10.1039/d3ta07895g), 2024-01-01
Supplement: d3ta07895g1.pdf [file d3ta07895g1.pdf]

## Supporting Information

### **Unveiling the Role of Ground State Charge Transfer Complex in Carbon Nanoparticles for Highly Efficient Metal-free Solar Hydrogen Production**

Subhajit Kar<sup>1</sup>, Amit Kumar<sup>2</sup>, Ramesh Mandal<sup>1</sup>, Sakshi Chawla<sup>2</sup>, Shanti Gopal Patra<sup>3</sup>, Arijit De<sup>2\*</sup>, and Santanu Bhattacharyya<sup>1\*</sup>

*<sup>1</sup>Department of Chemical Sciences, Indian Institute of Science Education and Research Berhampur, Berhampur, Odisha-760010, India.*

*<sup>2</sup>Condensed Phase Dynamics Group, Department of Chemical Sciences, Indian Institute of Science Education and Research Mohali, SAS Nagar, Punjab 140306, India.*

*<sup>3</sup>Department of Chemistry, National Institute of Technology Silchar, Silchar, 788010, India.*

\*- Corresponding authors: E-mail:

A.D - [akde@iisermohali.ac.in](mailto:akde@iisermohali.ac.in), S.B.- [santanub@iiserbpr.ac.in](mailto:santanub@iiserbpr.ac.in)

## **Contents:**

SI. Single Wavelength Analysis (fs-TA) for 400 nm Pump.

SII. Single Wavelength Analysis for 530 nm Pump.

SIII. Fluorescence Lifetime Studies.

SIV. Detailed Characterization

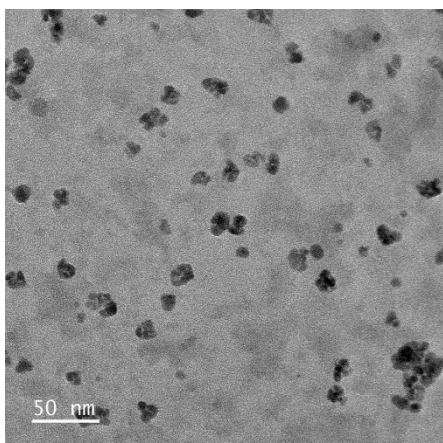

**Fig-S1:** HRTEM image of N, P-CNPs at relatively lower resolutions.

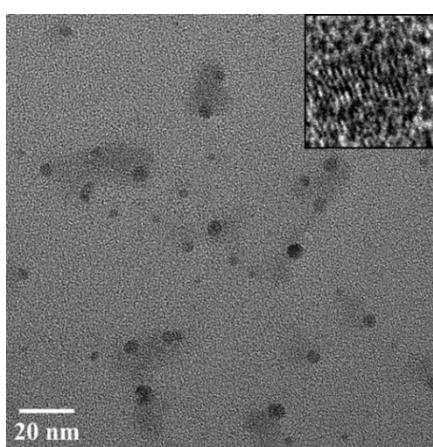

**Fig-S2:** HRTEM image of N-CDs.

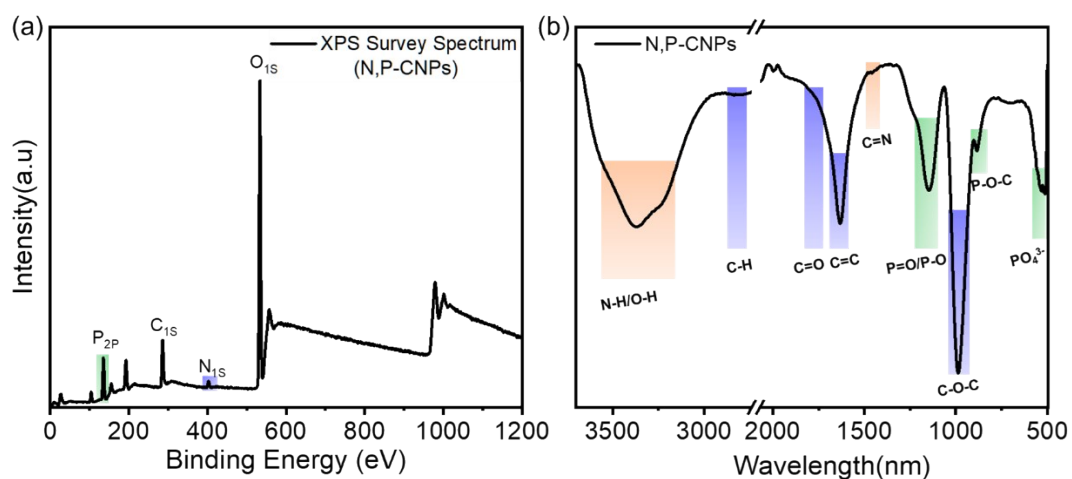

**Fig-S3:** XPS survey spectra (a) and FTIR spectra (b) of N, P-CNPs.

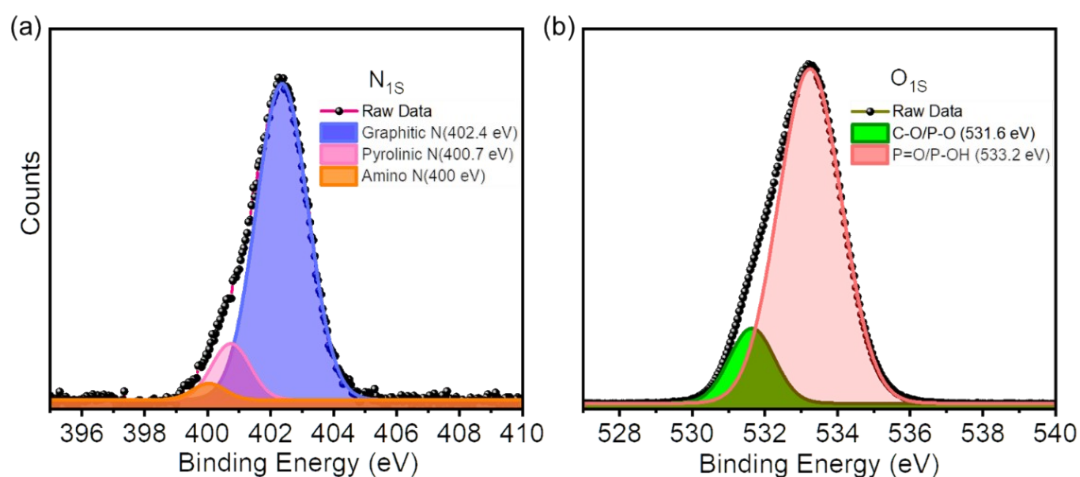

**Fig-S4:** Deconvoluted XPS spectra of N, P-CNPs: (a) high-resolution  $N_{1s}$  and  $O_{1s}$  spectra (b) respectively.

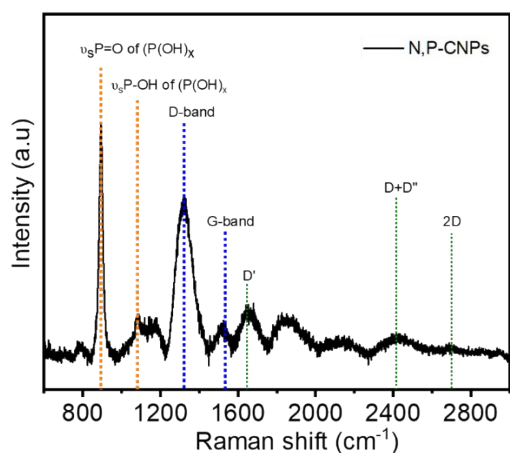

**Fig-S5:** Raman spectra of as-synthesized N, P-CNPs.

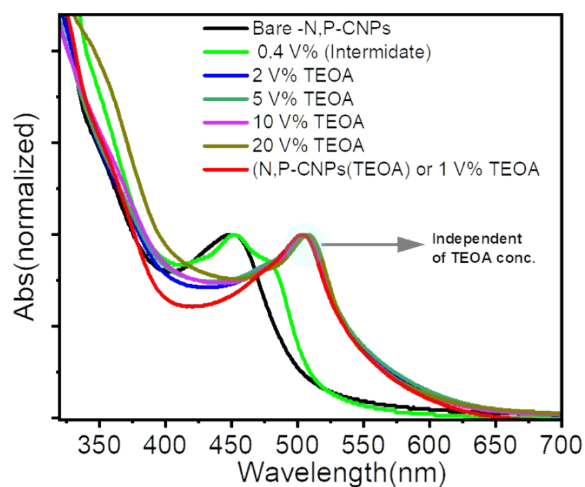

**Fig-S6:** UV-Vis absorption spectra (normalized) of N, P-CNPs with increasing TEOA concentration.

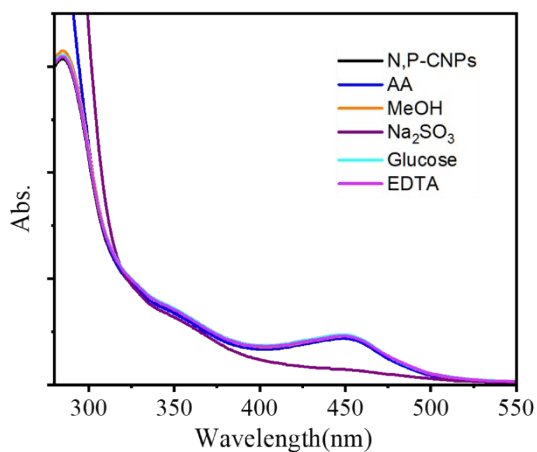

**Fig-S7:** UV-Vis absorption spectra of pure N, P-CNPs, and upon addition of common SEDs.

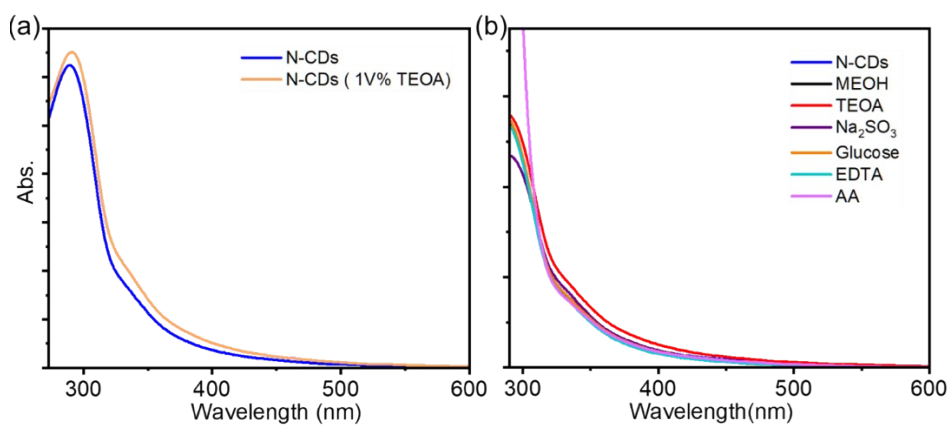

**Fig-S8:** UV-Vis absorption spectra of pure N-CDs and upon TEOA (1V %) addition (a). UV-Vis absorption spectra of N-CDs upon common SEDs addition (b).

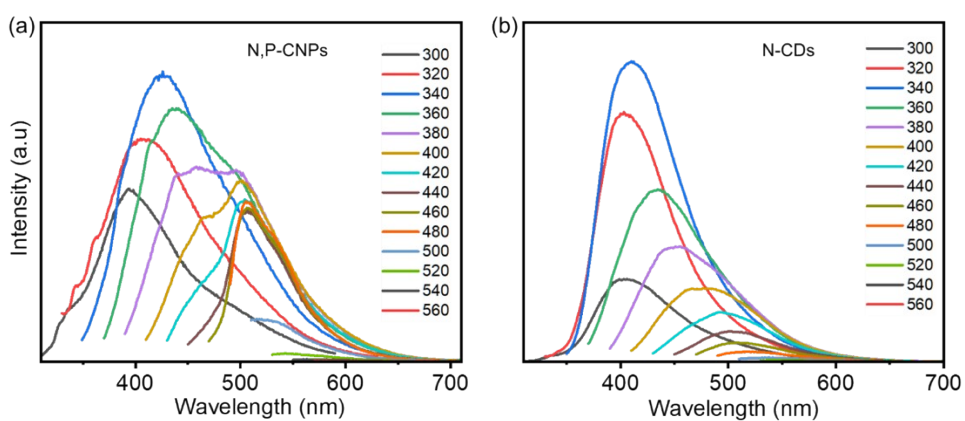

**Fig-S9:** Steady state PL emission spectra N, P-CNPs (a), and pure N-CDs (b) respectively.

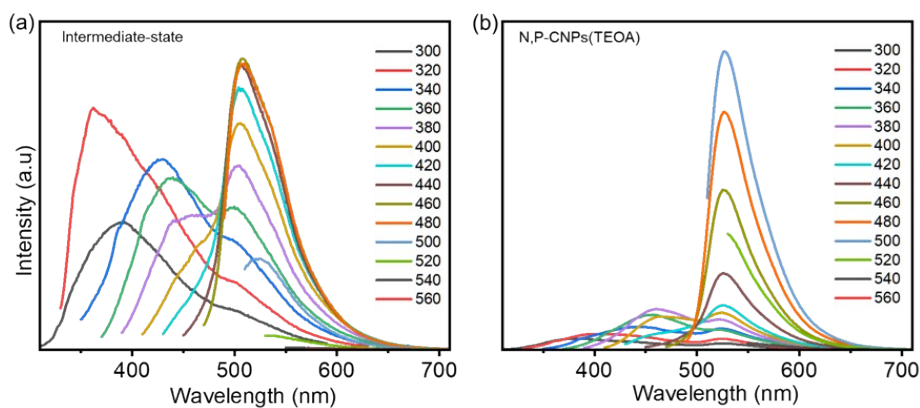

**Fig-S10:** Steady state PL emission spectra of intermediate state between *N*, *P*-CNPs, and TEOA (0.4V % TEOA) (a), and fully complexed *N*, *P*-CNPs (TEOA) adduct (1V % TEOA) (b).

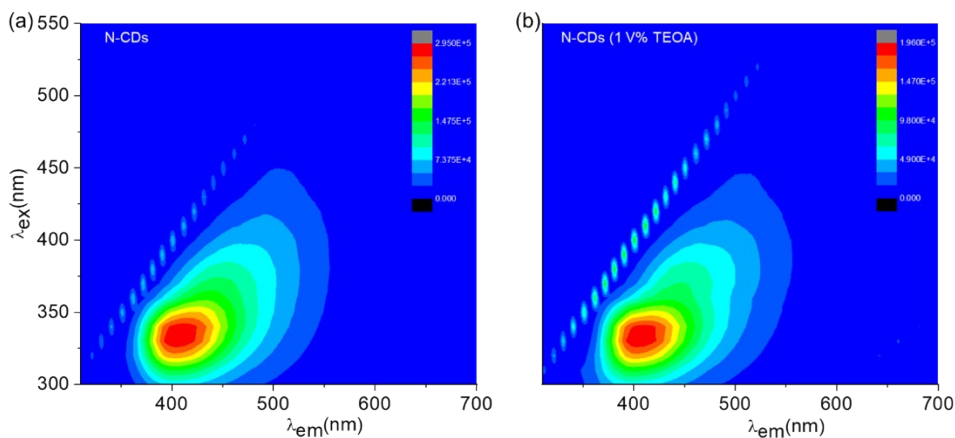

**Fig-S11:** Steady state PL emission spectra bare *N*-CDs (a) and *N*-CDs in the presence of TEOA (1V %) (b).

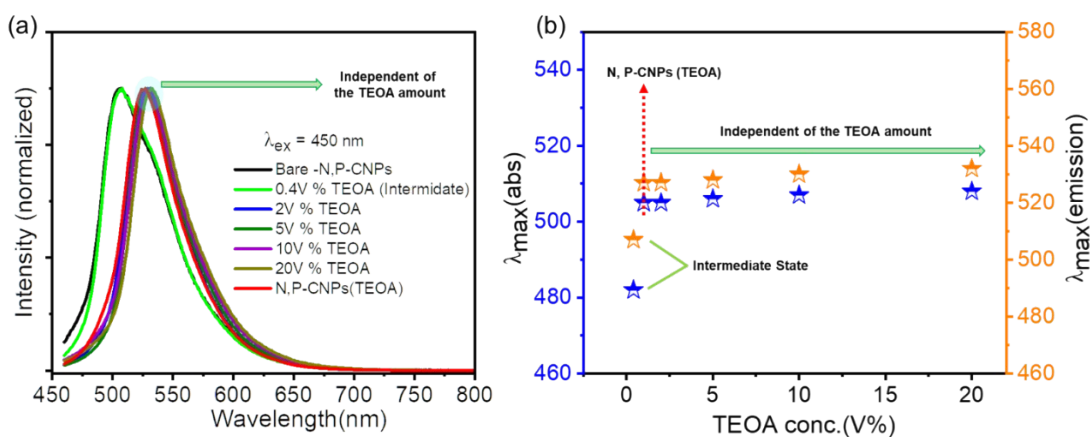

**Fig-S12:** PL emission ( $\lambda_{ex} = 450 \text{ nm}$ ) spectra (normalized) of *N*, *P*-CNPs with increasing TEOA concentration (a). Location of absorption maxima and PL emission maxima ( $\lambda_{ex} = 450 \text{ nm}$ ) Vs. TEOA amount in *N*, *P*-CNPs (b).

| Sample Name      | $\lambda_{\text{ex}}(\text{nm})$ | $\alpha_1$ | $\alpha_2$ | $\tau_1$ | $\tau_2$ | $\tau_{\text{avg}}$ |
|------------------|----------------------------------|------------|------------|----------|----------|---------------------|
| N, P-CNPs        | 450                              | 0.89       | 0.11       | 0.44     | 1.81     | 0.59                |
| N, P-CNPs (TEOA) | 450                              | 0.92       | 0.08       | 2.11     | 8.84     | 2.70                |

**Table-S1:** Parameters of time-resolved fluorescence lifetime of N, P-CNPs & N, P CNPs (TEOA) data fitted with bi-exponential decay kinetics.

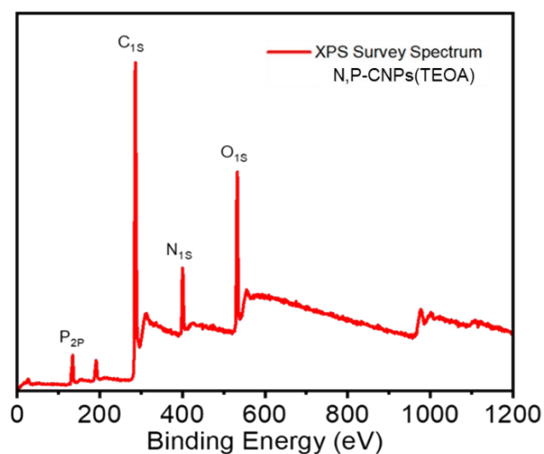

**Fig-S13:** XPS survey spectra of N, P-CNPs (TEOA).

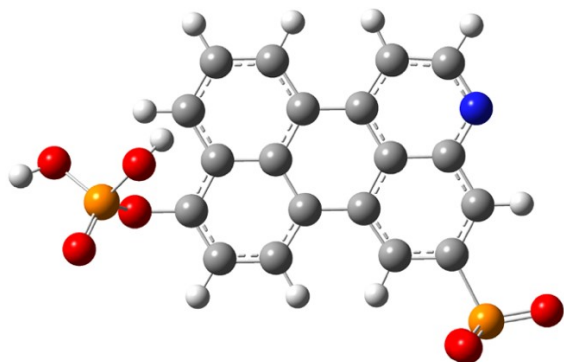

**Fig-S14:** Ball sticks representation of model N, P-CNPs (TEOA) revealing the state of N, P-CNPs after complexation with TEOA.

---

| Center Number | Atomic Number | Atomic Type | Coordinates (Angstroms) |          |          |
|---------------|---------------|-------------|-------------------------|----------|----------|
|               |               |             | X                       | Y        | Z        |
| 1             | 6             | 0           | 2.662960                | 3.983775 | 0.387988 |

---

|    |    |   |           |           |           |
|----|----|---|-----------|-----------|-----------|
| 2  | 6  | 0 | 1.291828  | 3.764208  | 0.210172  |
| 3  | 6  | 0 | 0.822300  | 2.449924  | 0.028190  |
| 4  | 6  | 0 | 3.181159  | 1.744884  | 0.225631  |
| 5  | 6  | 0 | -0.586191 | 2.127809  | -0.177125 |
| 6  | 6  | 0 | 1.420252  | 0.030470  | -0.125783 |
| 7  | 6  | 0 | 0.004492  | -0.299927 | -0.300594 |
| 8  | 6  | 0 | -0.972148 | 0.753490  | -0.341974 |
| 9  | 6  | 0 | -0.440827 | -1.628363 | -0.424771 |
| 10 | 6  | 0 | 2.429745  | -0.937243 | -0.116728 |
| 11 | 6  | 0 | 3.799964  | -0.620383 | 0.055624  |
| 12 | 6  | 0 | 4.151386  | 0.709259  | 0.226892  |
| 13 | 1  | 0 | 5.203408  | 0.969270  | 0.363708  |
| 14 | 1  | 0 | 3.019534  | 5.015975  | 0.530674  |
| 15 | 6  | 0 | -1.581583 | 3.125787  | -0.218873 |
| 16 | 6  | 0 | -2.922198 | 2.810823  | -0.441093 |
| 17 | 6  | 0 | -3.330890 | 1.489727  | -0.609504 |
| 18 | 6  | 0 | -2.365571 | 0.439383  | -0.547534 |
| 19 | 1  | 0 | -3.661933 | 3.615684  | -0.499539 |
| 20 | 6  | 0 | -1.794394 | -1.938693 | -0.582680 |
| 21 | 1  | 0 | -2.130176 | -2.975501 | -0.652893 |
| 22 | 6  | 0 | -2.731867 | -0.923759 | -0.649794 |
| 23 | 6  | 0 | 1.788864  | 1.404632  | 0.041210  |
| 24 | 7  | 0 | 3.586705  | 3.036650  | 0.397143  |
| 25 | 1  | 0 | -4.362614 | 1.260310  | -0.882137 |
| 26 | 8  | 0 | -4.095800 | -1.238595 | -0.812832 |
| 27 | 15 | 0 | -5.144525 | -1.295562 | 0.413286  |
| 28 | 8  | 0 | -4.586686 | -0.273611 | 1.515695  |
| 29 | 8  | 0 | -5.536050 | -2.614448 | 0.961203  |
| 30 | 8  | 0 | -6.410365 | -0.540912 | -0.294862 |
| 31 | 1  | 0 | -7.198439 | -1.067573 | -0.102564 |
| 32 | 1  | 0 | -4.094564 | 0.483489  | 1.125680  |
| 33 | 1  | 0 | 0.284117  | -2.439591 | -0.382331 |
| 34 | 1  | 0 | -1.299984 | 4.170576  | -0.088495 |
| 35 | 1  | 0 | 2.199990  | -1.994778 | -0.250947 |
| 36 | 1  | 0 | 0.612800  | 4.617929  | 0.215455  |



|    |    |   |          |           |           |
|----|----|---|----------|-----------|-----------|
| 37 | 15 | 0 | 4.996784 | -2.055765 | 0.028401  |
| 38 | 8  | 0 | 4.459988 | -2.907060 | 1.199483  |
| 39 | 8  | 0 | 6.404580 | -1.476367 | 0.225130  |
| 40 | 8  | 0 | 4.711002 | -2.643662 | -1.370998 |

**Table-S2:** Coordinates of the optimized geometries of *N, P*-CNPs (TEOA) model.

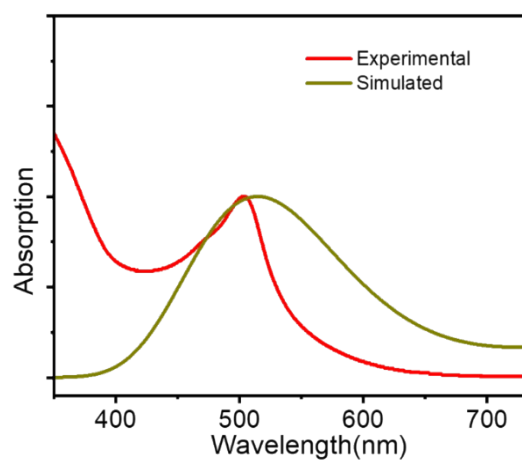

**Fig-S15:** Comparison of theoretical and experimental UV-visible absorption data (normalized) of model *N, P*-CNPs (TEOA).

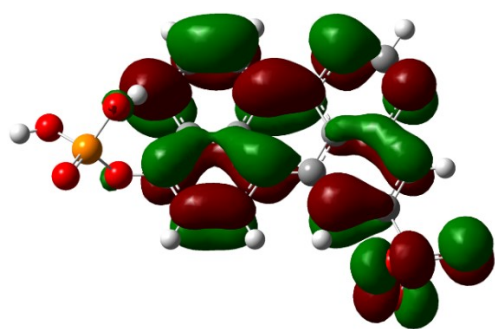

**Fig-S16:** Representation of LUMO of model *N, P*-CNPs (TEOA).

## **Femtosecond transient absorption spectroscopy (fs-TAS)**

To examine ultrafast charge carrier relaxation dynamics, pump-probe spectroscopy was employed. A custom femtosecond transient-absorption spectroscopy setup from Newport Corp. was employed. In summary, an ultrashort pulse centered at 800 nm was generated by a Ti: sapphire regenerative amplifier (Libra, Coherent Inc.) with a repetition rate of 1 kHz and a pulse width of 55 fs. Then, this pulse was divided into pump and probe pulses using ultrafast beam splitters. A type I -barium borate (BBO) crystal was used to frequency-double the 800 nm output to produce the 400 nm pump pulse. A commercially available non-collinear optical parametric amplifier (NOPA) (TOPAS, Light Conversion) was used to obtain the 530 nm pulse. A portion of the amplified laser output was focused on a CaF<sub>2</sub> crystal to produce a time-delayed broadband white light continuum. This continuum served as a probe in the experiment. To obtain a differential time-resolved transient absorption ( $\Delta OD$ ) for each pump-probe delay, a mechanical chopper (New Focus 3502, Newport Corp.) was used to block the alternate pump pulses at 500 Hz.

### **SI. Single wavelength analysis for 400 nm pump:**

The single wavelength kinetic fitting is performed at the maxima of each signal to reveal the decay dynamics corresponding to different relaxation processes. The kinetic fitting at the selected wavelengths for the 400 nm pump is shown for pure N,P-CNPs in figure SV-(i) (a) , N,P-CNPs(TEOA) or 1V% TEOA (figure SV-(i) (b)), 2V% and 5V% TEOA in figure SV-(i) (c-d). In pure N,P-CNPs, three-time components are obtained by fitting the kinetic traces at 460 and 510 nm. The fastest time component ( $\tau_1$ ) corresponds to the hot charge carrier relaxation, the intermediate time component ( $\tau_2$ ) corresponds to the transfer of population to an emissive state in N,P-CNPs, and the slower time component is related to the charge recombination. However, after the addition of TEOA, the ESA at 450 nm signal is fitted with two exponentials, with the fastest component ( $\tau_1$ ) related to charge relaxation and the slowest component ( $\tau_2$ ) corresponding to charge recombination. In contrast, the ESA signal at 690 nm

decays is fitted with three exponentials with a fast component ( $\tau_1$ ) due to hot charge carrier relaxation, an intermediate time component ( $\tau_2$ ) due to transfer of population to charge separated state a longer component ( $\tau_3$ ) that corresponds to charge recombination. A similar kinetic model is used for the other two samples with more concentration of TEOA (2-5V%).

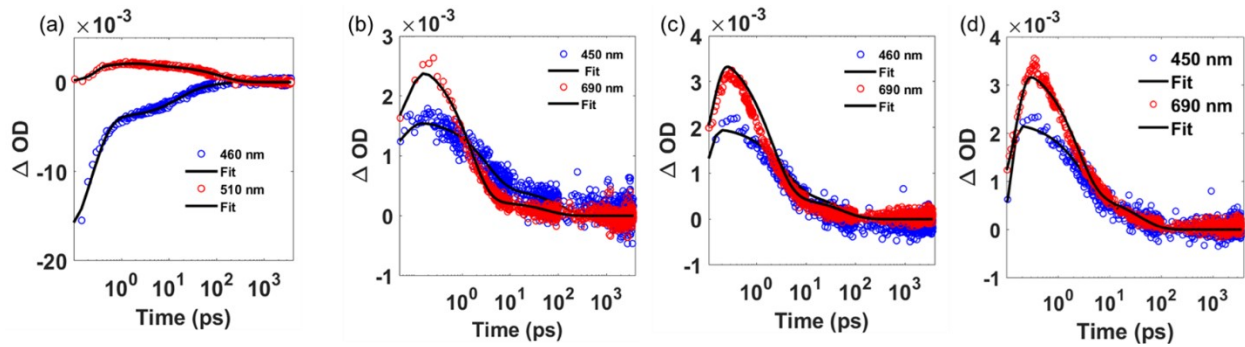

**Figure- SI(i):** Single wavelength kinetic traces ( $\lambda_{pump}=400$  nm): along with fit (in black) to raw data (in scatter) at a selected wavelength for (a) Pure N, P-CNPs, (b) 1V% TEOA, (c) 2V% TEOA, and (d) 5V% TEOA.

## SII. Single wavelength analysis for 530 nm pump:

Single wavelength kinetic fitting is performed at the maxima of each signal (430 nm and 519 nm) using three exponentials. For ESA at 519 nm, the fastest time component ( $\tau_1$ ) is related to the initial hot charge carrier relaxation. The intermediate time component ( $\tau_2$ ) corresponds to the transfer of the population to the charge-separated state. Finally, the slowest time component ( $\tau_3$ ) is related to charge recombination. ESA signal at 430 nm is also fitted with three exponentials. The single-wavelength kinetic trace and the corresponding fitting are depicted in figure SVII(i) for N,P-CNPs(TEOA) or 1V%, 2V%, and 5V% TEOA.

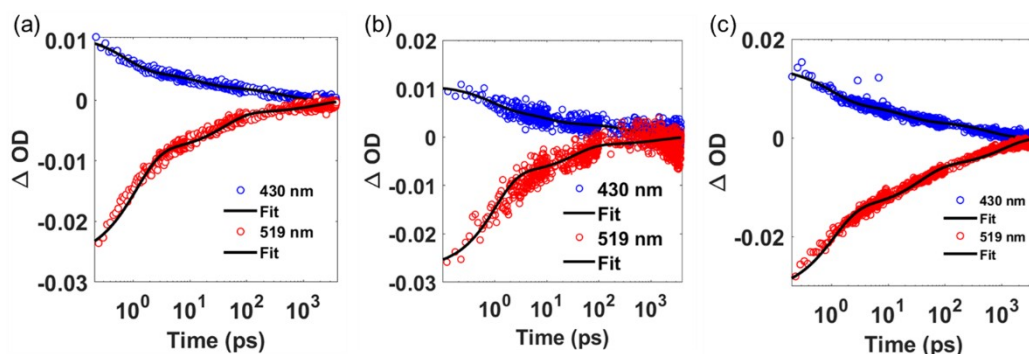

**Figure S11(i):** Single wavelength kinetic traces ( $\lambda_{pump}=530$  nm): along with fit (in black) to raw data (in scatter) at selected wavelength for (a) *N, P*-CNPs(TEOA) or 1V% TEOA, (b) 2V% TEOA, and (c) 5V% TEOA.

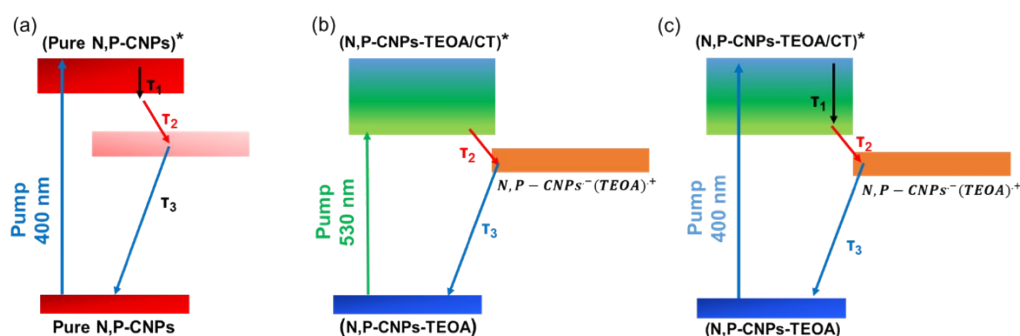

**Fig-S17:** Proposed kinetic model for pure (a) *N, P*-CNPs and (b, c) *N, P*-CNPs (TEOA) complex involving multi-relaxation pathways corresponding to charge separation and recombination.

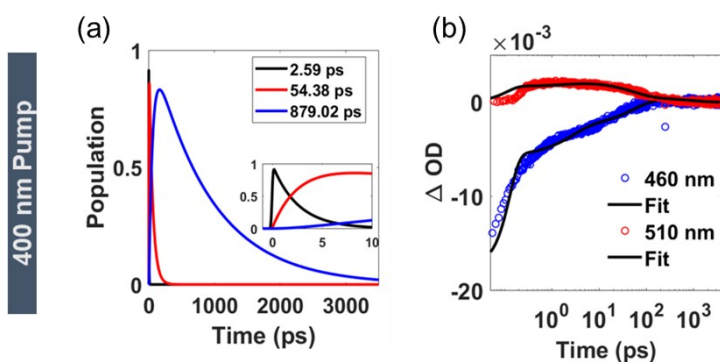

**Figure-S18:** Femtosecond transient absorption studies of pure *N, P*-CNPs, (a) time evolution population, and (b) kinetic traces along with fit (in black) to raw data (in scatter) at different select probe wavelengths.

| Sample         | Signal/Wavelength (nm) | $\alpha_1$ | $\tau_1$ (ps) | $\alpha_2$ | $\tau_2$ (ps) | $\alpha_3$ | $\tau_3$ (ps) | RMS  |
|----------------|------------------------|------------|---------------|------------|---------------|------------|---------------|------|
| Pure N, P-CNPs | GSB (450)              | 0.74       | 0.20          | 0.12       | 15.5          | 0.14       | 79.9          | 0.98 |
|                | ESA (510)              | 0.21       | 0.70          | 0.17       | 4.27          | 0.62       | 128.6         | 0.98 |

**Table- S3:** TA kinetic fit parameters at the different probe wavelengths for 400 nm excitation.

| Sample                        | Signal/Wavelength h (nm) | $\alpha_1$ | $\tau_1$ (ps) | $\alpha_2$ | $\tau_2$ (ps) | $\alpha_3$ | $\tau_3$ (ps) | RMS  |
|-------------------------------|--------------------------|------------|---------------|------------|---------------|------------|---------------|------|
| N, P-CNPs(TEOA) (530 nm pump) | ESA (430)                | 0.54       | 0.72          | 0.25       | 14.08         | 0.21       | 457.60        | 0.96 |
|                               | GSB+SE (519)             | 0.66       | 1.12          | 0.25       | 40.23         | 0.08       | 1909.0        | 0.94 |
| N, P-CNPs(TEOA) (400 nm pump) | ESA (450)                | 0.96       | 3.30          | 0.04       | 110.0         | -          | -             | 0.82 |
|                               | ESA (690)                | -<br>0.014 | 0.90          | 0.86       | 1.62          | 0.13       | 176.0         | 0.92 |

**Table-S4:** TA kinetic fit parameters for N, P-CNPs (TEOA) or 1V% TEOA at the different probe wavelengths for 530 and 400 nm excitation.

| Sample                      | Pump wavelength | $\tau_1$ (ps) | $\tau_2$ (ps) | $\tau_3$ (ps) | RMS     |
|-----------------------------|-----------------|---------------|---------------|---------------|---------|
| Pure N,P-CNPs               | 400 nm          | 2.59          | 54.38         | 879.0         | 0.00021 |
| N,P-CNPs( TEOA) or 1%V TEOA | 400 nm          | 0.79          | 4.45          | 1940          | 0.00017 |
|                             | 530 nm          | -             | 6.19          | 1180          | 0.00075 |

**Table S5:** Kinetic fit parameters of fs-TA data obtained from global analysis.

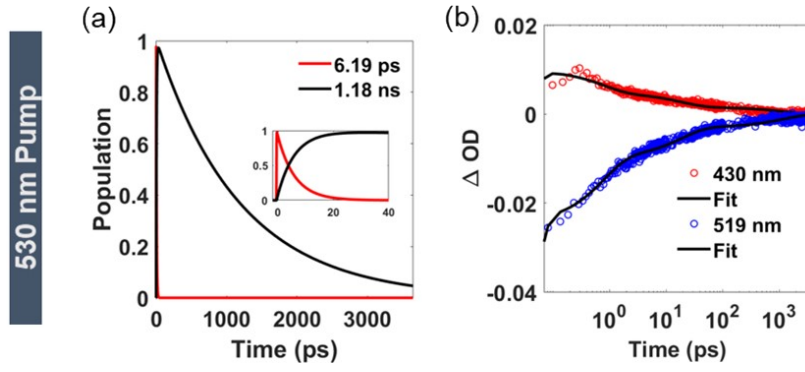

**Figure- S19:** Femtosecond transient absorption studies of *N, P*-CNPs (TEOA) or 1 V% TEOA, (a) time evolution population and (b) kinetic traces along with fit (in black) to raw data (in scatter) at different select probe wavelengths.

### III. Fluorescence lifetime studies:

Fluorescence lifetime measurements are conducted using the Deltaflux system, a commercial time-correlated single photon counting (TCSPC) instrument manufactured by Horiba Scientific. Laser diodes with a central wavelength of 405 nm are utilized for studying pure *N, P*-CNPs, and solutions containing *N, P*-CNPs with different V% of TEOA. To investigate the fluorescence lifetime of the *N, P*-CNPs(TEOA) charge transfer state with varying concentrations of TEOA (1-5 V%) are excited using a 510 nm laser diode. For 510 nm excitation, the fluorescence time constant of the acquired data is determined using DAS6 decay analysis software integrated with the instrument, which utilizes a fitting Equation 1. Equation-2 is used for fitting the decay traces of 405 nm data<sup>1</sup>.

$$I(t) = A + \sum_i B_i \exp\left(\frac{-t}{\tau_i}\right) \quad (1)$$

$$\alpha_i = \frac{B_i}{\sum_{i=1} B_i}$$

and

$$Y(t, \mu, t_p, \sigma) = \sum_{i=1}^n \frac{\alpha_i}{2} e^{\left( \frac{1}{2\tau_1} \left( \frac{\sigma^2}{\tau_i} - 2(t-u) \right) \right)} \left[ 1 - \operatorname{erf} \left( \frac{\sigma^2 - \tau_i(t-u)}{\sigma \sqrt{2\tau_i}} \right) \right] \quad (2)$$

Where  $A$  is the background term,  $\tau_i$  represents the fluorescence decay,  $B_i$  is the pre-exponential value relative to the lifetime component with corresponding amplitudes  $\alpha_i$ . The average lifetime ( $\tau_{avg}$ ) is studied with the following equation.

$$\tau_{av} = \frac{\sum_i \alpha_i \tau_i}{\sum_i \alpha_i} \quad (3)$$

To extract the time component from the TA data, kinetic traces were fitted with equation 2 for both pump excitation (400 nm, 530 nm).

| Sample                          | $\lambda_{ex}(\text{nm})$ | $\alpha_1$ | $\tau_1$<br>(ns) | $\alpha_2$ | $\tau_2$<br>(ns) | $\tau_{avg}$<br>(ns) | $\chi^2$ |
|---------------------------------|---------------------------|------------|------------------|------------|------------------|----------------------|----------|
| Pure N, P CNPs                  | 405                       | 0.77       | 0.44             | 0.23       | 4.34             | 1.32                 | 0.99     |
| N, P-CNPs( TEOA)<br>or 1%V TEOA | 405                       | 0.65       | 0.68             | 0.35       | 3.63             | 1.71                 | 0.99     |
| N, P-CNPs( TEOA)<br>or 1%V TEOA | 510                       | 0.64       | 0.67             | 0.36       | 2.16             | 1.21                 | 0.89     |

**Table S6:** Fluorescence lifetime and corresponding amplitudes using 405 and 510 nm diode.

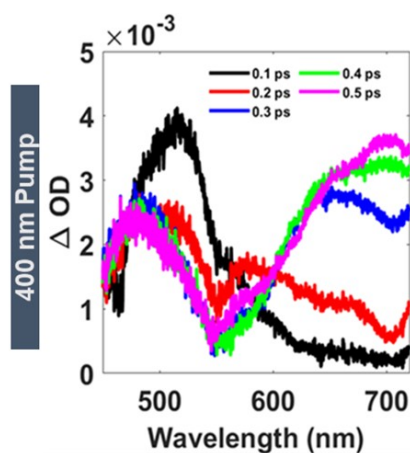

**Figure- S20:** Spectral traces for *N, P*-CNPs (TEOA) or 1V% TEOA at early time delays.

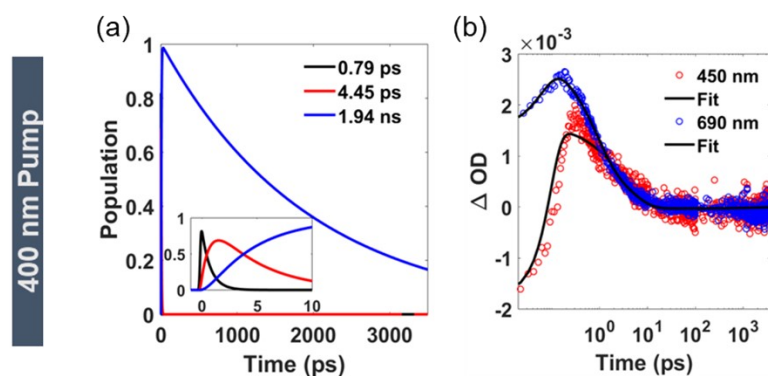

**Figure- S21:** Femtosecond transient absorption studies of *N, P*-CNPs (TEOA) or 1 V% TEOA, (a) time evolution population and (b) kinetic traces along with fit (in black) to raw data (in scatter) at different select probe wavelengths.

| Sample            | Signal/Wavelength (nm) | $\alpha_1$ | $\tau_1$ (ps) | $\alpha_2$ | $\tau_2$ (ps) | $\alpha_3$ | $\tau_3$ (ps) | RMS  |
|-------------------|------------------------|------------|---------------|------------|---------------|------------|---------------|------|
| 2V% TEOA (530 nm) | ESA (430)              | 0.46       | 0.84          | 0.26       | 9.45          | 0.27       | 550.0         | 0.71 |
|                   | GSB+SE (519)           | 0.70       | 1.02          | 0.25       | 33.78         | 0.05       | 1500.0        | 0.78 |
| 5V% TEOA (530 nm) | ESA (430)              | 0.50       | 0.98          | 0.25       | 18.26         | 0.25       | 609.3         | 0.95 |
|                   | GSB+SE (519)           | 0.51       | 1.08          | 0.29       | 35.41         | 0.20       | 1083.0        | 0.97 |
| 2V% TEOA (400 nm) | ESA (460)              | 0.71       | 3.50          | 0.29       | 58.2          | -          | -             | 0.92 |
|                   | ESA (690)              | -0.004     | 0.94          | 0.89       | 2.0           | 0.10       | 56.5          | 0.98 |
| 5V% TEOA (400 nm) | ESA (450)              | 0.72       | 3.10          | 0.28       | 42.9          | -          | -             | 0.87 |



|  |           |       |      |      |     |      |      |      |
|--|-----------|-------|------|------|-----|------|------|------|
|  | ESA (690) | -0.56 | 0.99 | 0.36 | 2.1 | 0.08 | 37.4 | 0.98 |
|--|-----------|-------|------|------|-----|------|------|------|

**Table-S7:** TA kinetic fit parameters for varying TEOA content at the different probe wavelengths for 530 and 400 nm excitation.

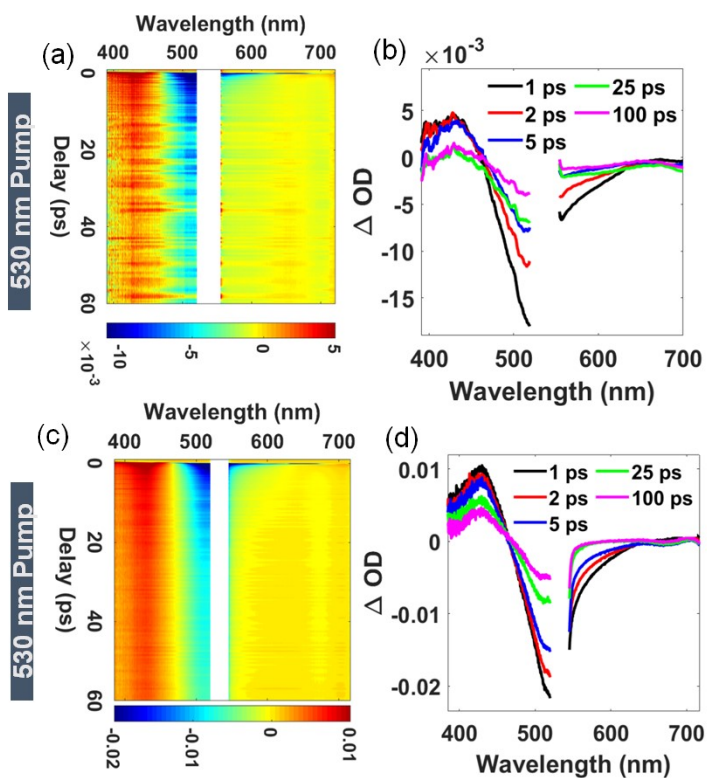

**Figure- S22:** Femtosecond transient absorption studies of *N, P*-CNPs(TEOA) adduct at higher TEOA conc of 2V% (top row) and 5V% (bottom row) ( $\lambda_{pump}=530$  nm): (a, c) transient contour maps, (b, d) spectral traces at the different probe delay.

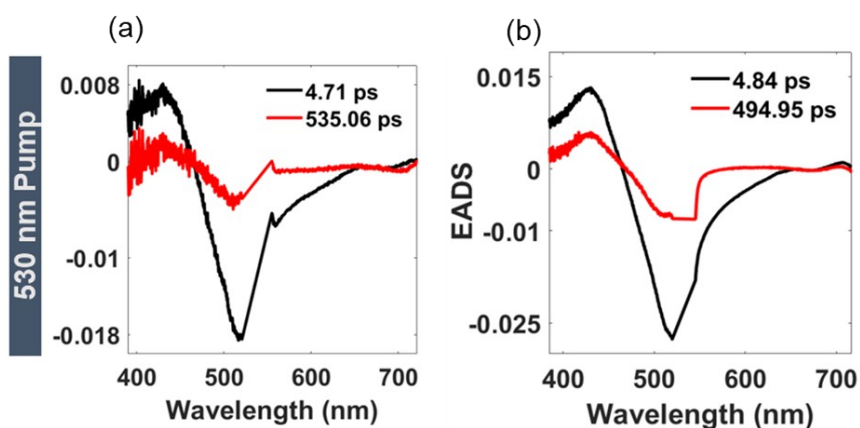

**Figure- S23:** Femtosecond transient absorption studies of *N, P*-CNPs(TEOA) adduct at higher TEOA conc of 2V% (left column) and 5V% (right column) ( $\lambda_{pump}=530$  nm): **(a-b)** evolution-associated decay spectra obtained from global analysis.

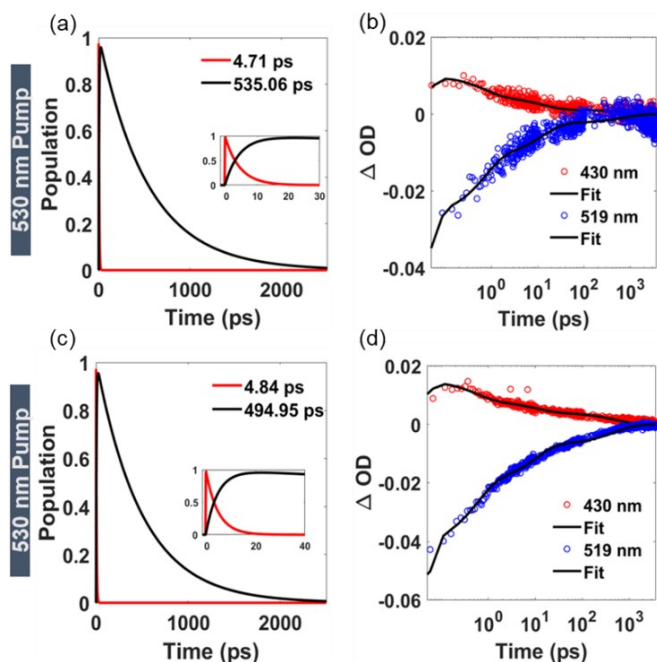

**Figure- S24:** Femtosecond transient absorption studies of *N, P*-CNPs(TEOA) adduct at higher TEOA conc of 2V% (top row) and 5V% (bottom row) ( $\lambda_{pump}=530$  nm): **(a-b)** time evolution population and **(c, d)** kinetic traces along with fit (in black) to raw data (in scatter) at different select probe wavelengths.

| Sample   | Pump wavelength | $\tau_1$ (ps) | $\tau_2$ (ps) | $\tau_3$ (ps) | RMS     |
|----------|-----------------|---------------|---------------|---------------|---------|
| 2V% TEOA | 400 nm          | 0.75          | 4.62          | 981.6         | 0.00018 |
|          | 530 nm          | -             | 4.71          | 535.06        | 0.00130 |
| 5V% TEOA | 400 nm          | 1.17          | 7.41          | 558.4         | 0.00017 |
|          | 530 nm          | -             | 4.84          | 494.95        | 0.00085 |

**Table- S8:** Kinetic fit parameters of fs-TA data obtained from global analysis.

| Sample   | $\lambda_{\text{ex}}(\text{nm})$ | $\alpha_1$ | $\tau_1$<br>(ns) | $\alpha_2$ | $\tau_2$<br>(ns) | $\tau_{\text{avg}}$<br>(ns) | $\chi^2$ |
|----------|----------------------------------|------------|------------------|------------|------------------|-----------------------------|----------|
| 2V% TEOA | 405                              | 0.57       | 0.41             | 0.43       | 1.75             | 0.98                        | 0.99     |
| 2V% TEOA | 510                              | 0.69       | 0.51             | 0.31       | 1.46             | 0.80                        | 0.96     |
| 5V% TEOA | 405                              | 0.66       | 0.33             | 0.34       | 1.57             | 0.74                        | 0.99     |
| 5V% TEOA | 510                              | 0.74       | 0.49             | 0.26       | 1.29             | 0.70                        | 0.87     |

**Table- S9:** Fluorescence lifetime and corresponding amplitudes using 405 and 510 nm diode.

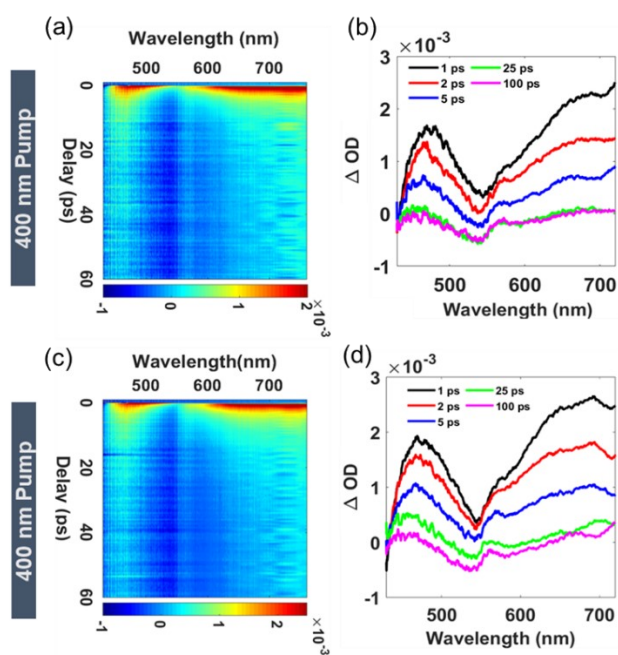

**Figure-S25:** Femtosecond transient absorption studies of *N, P*-CNPs (TEOA) adduct at higher TEOA concentration of 2V% (top row), 5V% (bottom row) ( $\lambda_{pump}=400$  nm): (A, F) transient contour maps, (B, G) spectral traces at the different probe delay.

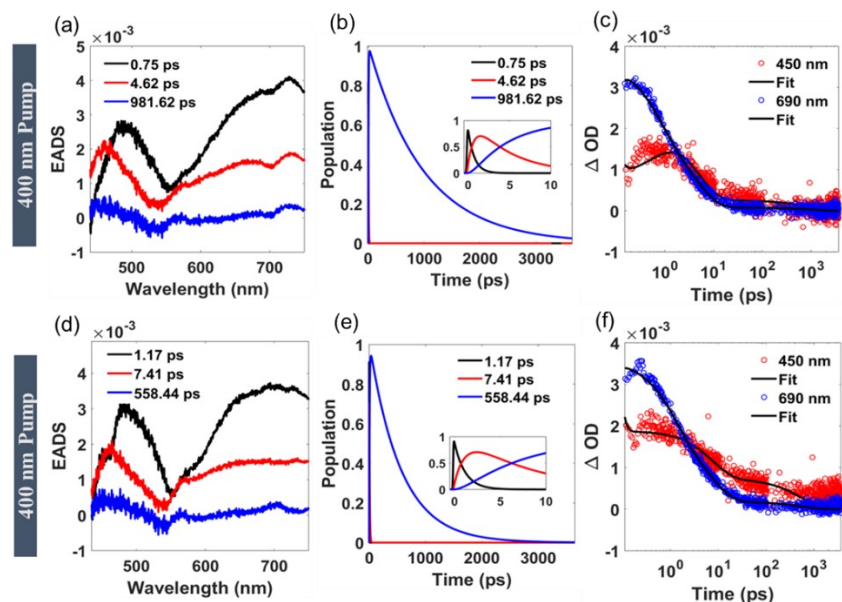

**Figure- S26:** Femtosecond transient absorption studies of *N, P*-CNPs (TEOA) adduct 2V% (top row), 5V% (bottom row) ( $\lambda_{pump}=400$  nm): (a, d) evolution-associated decay spectra obtained from global analysis, (b, e) time evolution population and (c, f) kinetic traces along with fit (in black) to raw data (in scatter) at different select probe wavelengths.

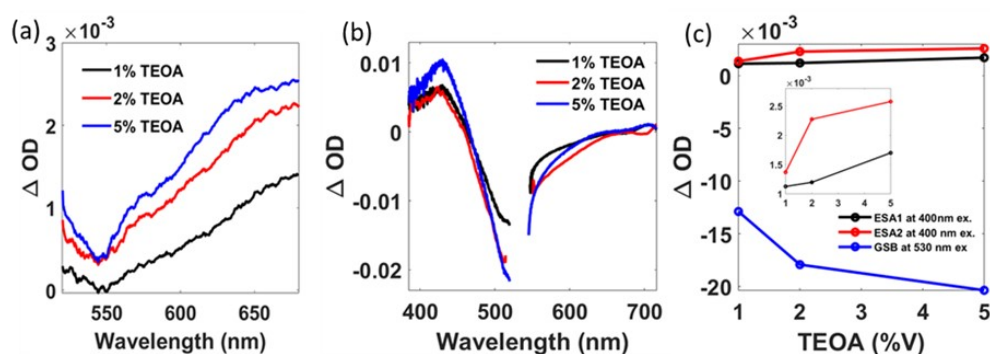

**Figure-S27:** Spectral traces for *N, P*-CNPs (TEOA) at different concentrations of TEOA at a probe delay of 1 ps corresponding to (a) 400 nm and (b) 530 nm pump excitations, respectively. (c) Variation of maximum intensity of differential absorption with TEOA concentration at ESA1

(460 nm) and ESA2 (690 nm) bands for 400 nm excitation, GSB (519 nm) band for 530 nm excitation.

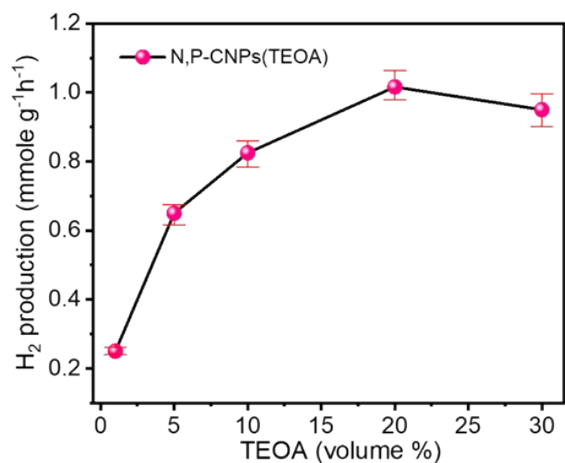

**Fig-S28:** Photo-catalytic hydrogen generation activities of N, P-CNPs as a function of TEOA concentration (volume %).

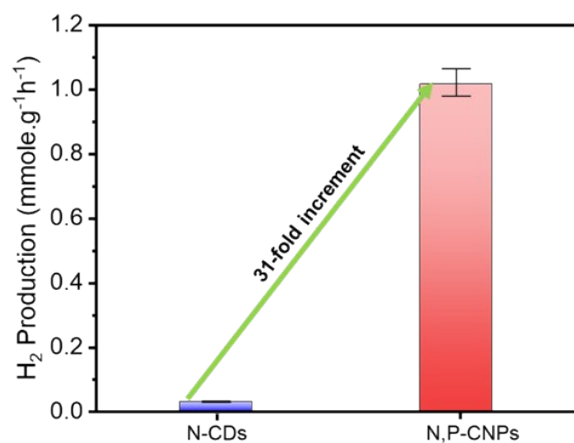

**Fig-S29:** A comparison of photo-catalytic hydrogen generation activities of N, P-CNPs, and N-CDs at similar TEOA environments.

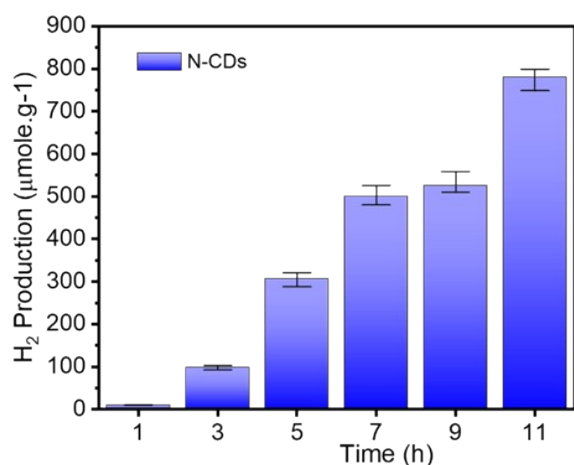

**Fig-S30:** Time-dependent photo-catalytic hydrogen generation activities of N-CDs.

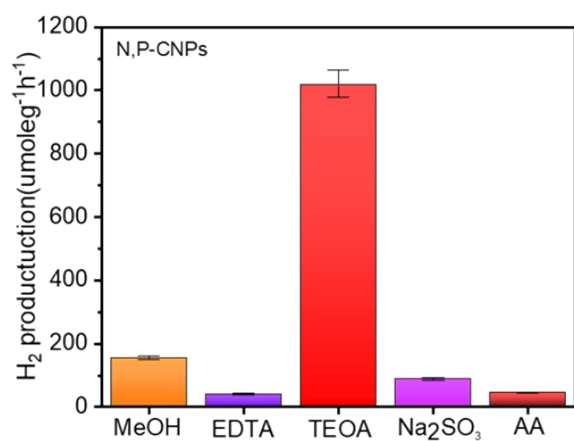

**Fig-S31:** Solar hydrogen production by N, P-CNPs in the presence of different sacrificial electron donors (SEDs).

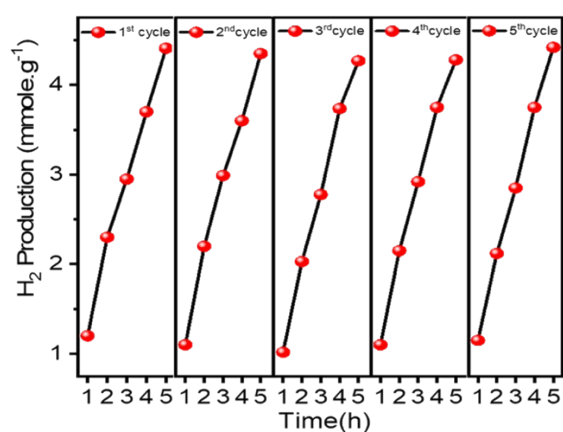

**Fig-S32:** N, P-CNPs (TEOA) photo-catalyst recycling for solar hydrogen production five times (every five hours).

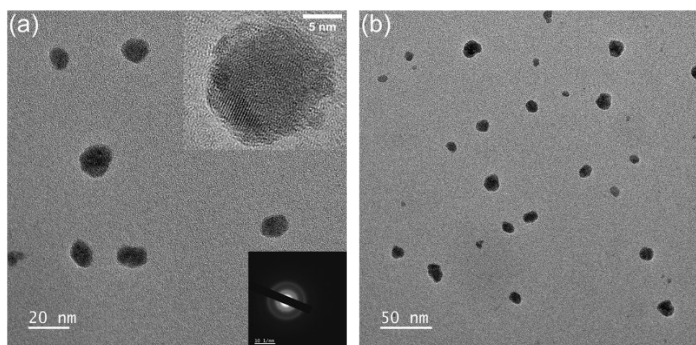

**Fig-S33:** Structural stability test of *N, P*-CNPs: Post catalytic (10h, without SEDs) morphological analysis using high-resolution (a) and low-resolution (b) TEM study.

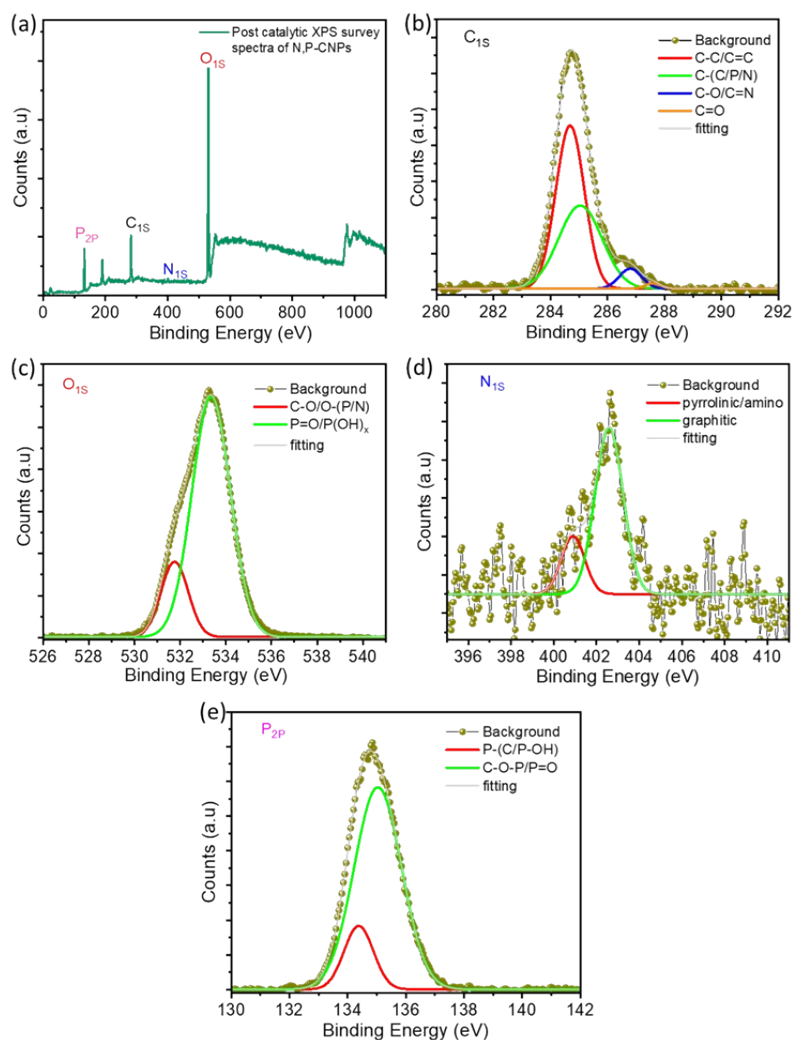

**Fig-S34:** Structural stability test of *N, P*-CNPs using elemental study (XPS): Post catalytic (10h, without SEDs) XPS survey spectrum (a), High-resolution  $C_{1s}$ , High-resolution  $N_{1s}$ , High-resolution  $P_{2p}$  spectrum, and High-resolution  $O_{1s}$  spectrum.

| Site   | Geometry                                                                            | $\Delta G_{\text{ads}}$<br>(kcal/mol) |
|--------|-------------------------------------------------------------------------------------|---------------------------------------|
| site_1 | 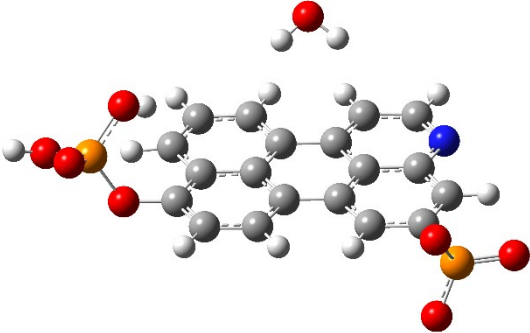  | -52.4                                 |
| site_2 |  | -54.4                                 |
| site_3 |  | -56.3                                 |



|        |                                                                                    |       |
|--------|------------------------------------------------------------------------------------|-------|
| site_4 | 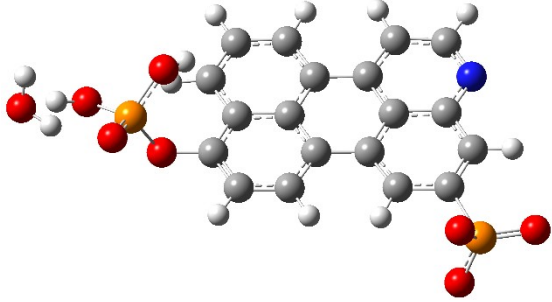  | -60.0 |
| site_5 |   | -67.8 |
| site_6 |  | -68.1 |

**Table-S10:** Gibbs free energy ( $\Delta G_{ads}$ ) of adsorbed water on different reactive sites for N, P-CNPs.

#### SIV. Detailed Characterization

All nanomaterials were morphologically analyzed using a JEOL JEM-F200 TEM instrument with a 200 kV voltage gradient. The TEM images were acquired by dropping significantly diluted samples onto a carbon-coated copper grid with perforations. FTIR (Fourier Transform Infrared Spectroscopy) readings were obtained using the BRUKER TENSOR II. Implementing the Anton Paar & Litesizer<sup>TM</sup> 500 instrument, the Zeta potentials of the samples were calculated. A smart probe-based Bruker AVANCE NEO Ascend 400 spectrometer is utilized

to obtain  $^{31}\text{P}$ -NMR spectra, and the measurements were done at 400MHz. The PHI 5000 Versa Probe-enabled X-ray photoelectron spectrometer (XPS) was utilized to evaluate each sample's surface elemental composition. Raman spectra of the samples were recorded using Renishaw Raman spectrometer equipped with a 785 nm excitation laser source. The UV-visible absorption characteristics of the samples were acquired using a spectrophotometer (Shimadzu, model UV-2550). A Modular Spectrofluorometer, Fluorolog-3 (300 W xenon source), was used to detect the samples' photoluminescence. For the time-resolved photoluminescence decay (TRPL) experiment, an EDINBURGH Life-Spec II model and a 450 nm laser excitation source were used. Besides, the Delatflux TCSPC system from Horiba was employed to examine the details of the N, P-CNPs (TEOA) complex using 405 and 510 nm excitation sources. The excited state dynamics were investigated using Newport's custom-built femtosecond transient absorption spectrometer. All electrochemical studies in this study are carried out using a CHI 760e electrochemical workstation.

## References

- (1) Silori, Y.; Chawla, S.; De, A. K, *ChemPhysChem* **2020**, *21* (17), 1908–1917.
